# Supplementary material for: Comparison of four handheld point-of-care ultrasound devices by expert users
Source: PubMed Central journal article supplement (PMC9263020; doi:10.1186/s13089-022-00274-6), 2022-07-07
Supplement: 13089_2022_274_MOESM1_ESM.pdf [file 13089_2022_274_MOESM1_ESM.pdf]

# Comparison of Handheld Point-of-care Ultrasound Devices

---

Goal: Gather quantitative and qualitative feedback from expert POCUS users on ease of use, image quality, and overall satisfaction of the most common handheld ultrasound devices available in the United States.

## Aims:

Assess the ease of use of 4 common handheld ultrasound devices based on physical set-up while scanning, intuitiveness of software application, weight, and maneuverability with one hand. Assess image quality based on detail resolution (clarity of 2 small structures), contrast resolution (differentiate structures of different shades of gray), penetration (ability to clearly see deep structures), and clutter (suppression of acoustic clutter/noise). Evaluate overall satisfaction of 4 different handheld devices and explore determinants of an expert user's satisfaction.

---

Please press "Submit" to BEGIN or "Save & Return Later" to RETURN at a later time (You will be sent an email to a unique link that will save your information).

# Demographics

---

First Name:

---

---

Last Name:

---

---

What is your primary specialty that you practice clinically?

- Hospital Medicine
- Emergency Medicine
- Critical Care Medicine
- Pulmonary/Critical Care Medicine
- Anesthesiology
- Primary Care
- Other

---

If Other specialty, please specify:

---

Years in practice after completing your specialty training?

- 0
- 1
- 2
- 3
- 4
- 5
- 6
- 7
- 8
- 9
- 10
- 11
- 12
- 13
- 14
- 15
- 16
- 17
- 18
- 19
- 20
- 21
- 22
- 23
- 24
- 25
- 26
- 27
- 28
- 29
- 30
- 31
- 32
- 33
- 34
- 35
- 36
- 37
- 38
- 39
- 40
- 41
- 42
- 43
- 44
- 45
- 46
- 47
- 48
- 49
- 50
- 51
- 52
- 53
- 54
- 55
- 56
- 57
- 58
- 59
- 60
- 61
- 62
- 63
- 64
- 65
- 66
- 67
- 68

- 69
- 70
- 71
- 72
- 73
- 74
- 75
- 76
- 77
- 78
- 79
- 80
- 81
- 82
- 83
- 84
- 85
- 86
- 87
- 88
- 89
- 90
- 91
- 92
- 93
- 94
- 95
- 96
- 97
- 98
- 99

Number of years using point-of-care ultrasound (POCUS)?

- 0
- 1
- 2
- 3
- 4
- 5
- 6
- 7
- 8
- 9
- 10
- 11
- 12
- 13
- 14
- 15
- 16
- 17
- 18
- 19
- 20
- 21
- 22
- 23
- 24
- 25
- 26
- 27
- 28
- 29
- 30
- 31
- 32
- 33
- 34
- 35
- 36
- 37
- 38
- 39
- 40
- 41
- 42
- 43
- 44
- 45
- 46
- 47
- 48
- 49
- 50
- 51
- 52
- 53
- 54
- 55
- 56
- 57
- 58
- 59
- 60
- 61
- 62
- 63
- 64
- 65
- 66
- 67
- 68

- 69
- 70
- 71
- 72
- 73
- 74
- 75
- 76
- 77
- 78
- 79
- 80
- 81
- 82
- 83
- 84
- 85
- 86
- 87
- 88
- 89
- 90
- 91
- 92
- 93
- 94
- 95
- 96
- 97
- 98
- 99

---

Which POCUS applications do you use routinely (select all that apply)?

- procedural guidance
- cardiac
- pulmonary
- abdomen
- vascular
- skin/soft tissues

---

Please press "Submit" after you have completed the survey. You will not be able to go back to a survey after you have pressed "Submit." You will be taken back to your queue of surveys to review the progress made and to select the next survey.

---

Please press "Save & Return Later" if you would like to save the information you have entered and return at a later time. You will be prompted to another screen to enter your email address. You will be sent an email to a unique link that will save your information.

# Butterfly

## Instructions:

Obtain these 3 views Parasternal long-axis view with color Doppler over the mitral valve Right upper quadrant FAST view (liver, kidney diaphragm visible) Internal jugular vein & common carotid transverse view with color Doppler over both vessels Answer questions below to rate the device on: Ease of use Image quality Overall satisfaction

Do you have prior experience using this device?

- None - "I've never used this device before."  
 Some - "I've used this device occasionally in patient care or teaching workshops, but I am not proficient in using it."  
 Extensive - "I use this device on a regular basis and am familiar with it."  
 Other

If Other, please explain:

---

## EASE OF USE

### Rate your level of agreement with each of statements.

|                                                                                                                | Strongly agree        | Agree                 | Neutral               | Disagree              | Strongly disagree     |
|----------------------------------------------------------------------------------------------------------------|-----------------------|-----------------------|-----------------------|-----------------------|-----------------------|
| The physical characteristics of this device made it easy to use (size, weight, hold in hand vs. use of stand). | <input type="radio"/> | <input type="radio"/> | <input type="radio"/> | <input type="radio"/> | <input type="radio"/> |
| The software was easy to navigate (changing modes, depth, gain).                                               | <input type="radio"/> | <input type="radio"/> | <input type="radio"/> | <input type="radio"/> | <input type="radio"/> |
| The device is easy to maneuver with one hand on the probe and one hand on the tablet/processor.                | <input type="radio"/> | <input type="radio"/> | <input type="radio"/> | <input type="radio"/> | <input type="radio"/> |

### Rate your level of satisfaction with the following statement.

|                                                                | Very satisfied        | Somewhat satisfied    | Neutral               | Somewhat dissatisfied | Very dissatisfied)    |
|----------------------------------------------------------------|-----------------------|-----------------------|-----------------------|-----------------------|-----------------------|
| My overall satisfaction with the ease of using this device was | <input type="radio"/> | <input type="radio"/> | <input type="radio"/> | <input type="radio"/> | <input type="radio"/> |

Comments:

**IMAGE QUALITY****Rate your level of agreement with each of statements.**

|                                                                                                                                     | Strongly agree        | Agree                 | Neutral               | Disagree              | Strongly disagree     |
|-------------------------------------------------------------------------------------------------------------------------------------|-----------------------|-----------------------|-----------------------|-----------------------|-----------------------|
| The detail resolution (clarity of 2 small structures) was good enough to answer common clinical questions.                          | <input type="radio"/> | <input type="radio"/> | <input type="radio"/> | <input type="radio"/> | <input type="radio"/> |
| The contrast resolution (differentiate structures of different shades of gray) was good enough to answer common clinical questions. | <input type="radio"/> | <input type="radio"/> | <input type="radio"/> | <input type="radio"/> | <input type="radio"/> |
| The penetration (ability to see deep structures well) was good.                                                                     | <input type="radio"/> | <input type="radio"/> | <input type="radio"/> | <input type="radio"/> | <input type="radio"/> |
| The clutter (acoustic clutter/noise) on the screen was minimal.                                                                     | <input type="radio"/> | <input type="radio"/> | <input type="radio"/> | <input type="radio"/> | <input type="radio"/> |

**Rate your level of satisfaction with the following statement.**

|                                                                   | Very satisfied        | Somewhat satisfied    | Neutral               | Somewhat dissatisfied | Very dissatisfied     |
|-------------------------------------------------------------------|-----------------------|-----------------------|-----------------------|-----------------------|-----------------------|
| My overall satisfaction with the image quality of this device was | <input type="radio"/> | <input type="radio"/> | <input type="radio"/> | <input type="radio"/> | <input type="radio"/> |

Comments:

**OVERALL SATISFACTION**

Which statement best expresses your overall satisfaction with this device for use in patient care?

- DISSATISFIED - "I would not use this device even if was given to me for free."  
 NEUTRAL - "I don't have strong feeling for or against this device. I might use it in patient care."  
 SATISFIED - "I like this device and would definitely use it in patient care."

Please describe the characteristics that made you feel satisfied, neutral, or dissatisfied with this device:

What are the main ADVANTAGES and DISADVANTAGES of this device currently?



---

Assuming a similar purchasing price to other devices on the market, would you personally buy or recommend this device for use in patient care?

- Yes  
 No

---

Why or Why not?

---

Please press "Submit" after you have completed the survey. You will not be able to go back to a survey after you have pressed "Submit." You will be taken back to your queue of surveys to review the progress made and to select the next survey.

---

Please press "Save & Return Later" if you would like to save the information you have entered and return at a later time. You will be prompted to another screen to enter your email address. You will be sent an email to a unique link that will save your information.

# Lumify (Philips)

## Instructions:

Obtain these 3 views Parasternal long-axis view with color Doppler over the mitral valve Right upper quadrant FAST view (liver, kidney diaphragm visible) Internal jugular vein & common carotid transverse view with color Doppler over both vessels Answer questions below to rate the device on: Ease of use Image quality Overall satisfaction

Do you have prior experience using this device?

- None - "I've never used this device before."  
 Some - "I've used this device occasionally in patient care or teaching workshops, but I am not proficient in using it."  
 Extensive - "I use this device on a regular basis and am familiar with it."  
 Other

If Other, please explain:

---

## EASE OF USE

### Rate your level of agreement with each of statements.

|                                                                                                                | Strongly agree        | Agree                 | Neutral               | Disagree              | Strongly disagree     |
|----------------------------------------------------------------------------------------------------------------|-----------------------|-----------------------|-----------------------|-----------------------|-----------------------|
| The physical characteristics of this device made it easy to use (size, weight, hold in hand vs. use of stand). | <input type="radio"/> | <input type="radio"/> | <input type="radio"/> | <input type="radio"/> | <input type="radio"/> |
| The software was easy to navigate (changing modes, depth, gain).                                               | <input type="radio"/> | <input type="radio"/> | <input type="radio"/> | <input type="radio"/> | <input type="radio"/> |
| The device is easy to maneuver with one hand on the probe and one hand on the tablet/processor.                | <input type="radio"/> | <input type="radio"/> | <input type="radio"/> | <input type="radio"/> | <input type="radio"/> |

### Rate your level of satisfaction with the following statement.

|                                                                | Very satisfied        | Somewhat satisfied    | Neutral               | Somewhat dissatisfied | Very dissatisfied)    |
|----------------------------------------------------------------|-----------------------|-----------------------|-----------------------|-----------------------|-----------------------|
| My overall satisfaction with the ease of using this device was | <input type="radio"/> | <input type="radio"/> | <input type="radio"/> | <input type="radio"/> | <input type="radio"/> |

Comments:

**IMAGE QUALITY****Rate your level of agreement with each of statements.**

|                                                                                                                                     | Strongly agree        | Agree                 | Neutral               | Disagree              | Strongly disagree     |
|-------------------------------------------------------------------------------------------------------------------------------------|-----------------------|-----------------------|-----------------------|-----------------------|-----------------------|
| The detail resolution (clarity of 2 small structures) was good enough to answer common clinical questions.                          | <input type="radio"/> | <input type="radio"/> | <input type="radio"/> | <input type="radio"/> | <input type="radio"/> |
| The contrast resolution (differentiate structures of different shades of gray) was good enough to answer common clinical questions. | <input type="radio"/> | <input type="radio"/> | <input type="radio"/> | <input type="radio"/> | <input type="radio"/> |
| The penetration (ability to see deep structures well) was good.                                                                     | <input type="radio"/> | <input type="radio"/> | <input type="radio"/> | <input type="radio"/> | <input type="radio"/> |
| The clutter (acoustic clutter/noise) on the screen was minimal.                                                                     | <input type="radio"/> | <input type="radio"/> | <input type="radio"/> | <input type="radio"/> | <input type="radio"/> |

**Rate your level of satisfaction with the following statement.**

|                                                                   | Very satisfied        | Somewhat satisfied    | Neutral               | Somewhat dissatisfied | Very dissatisfied     |
|-------------------------------------------------------------------|-----------------------|-----------------------|-----------------------|-----------------------|-----------------------|
| My overall satisfaction with the image quality of this device was | <input type="radio"/> | <input type="radio"/> | <input type="radio"/> | <input type="radio"/> | <input type="radio"/> |

Comments:

**OVERALL SATISFACTION**

Which statement best expresses your overall satisfaction with this device for use in patient care?

- DISSATISFIED - "I would not use this device even if was given to me for free."  
 NEUTRAL - "I don't have strong feeling for or against this device. I might use it in patient care."  
 SATISFIED - "I like this device and would definitely use it in patient care."

Please describe the characteristics that made you feel satisfied, neutral, or dissatisfied with this device:

What are the main ADVANTAGES and DISADVANTAGES of this device currently?

---

Assuming a similar purchasing price to other devices on the market, would you personally buy or recommend this device for use in patient care?

- Yes  
 No

---

Why or Why not?

---

Please press "Submit" after you have completed the survey. You will not be able to go back to a survey after you have pressed "Submit." You will be taken back to your queue of surveys to review the progress made and to select the next survey.

---

Please press "Save & Return Later" if you would like to save the information you have entered and return at a later time. You will be prompted to another screen to enter your email address. You will be sent an email to a unique link that will save your information.

# Kosmos (Echonus)

## Instructions:

Obtain these 3 views Parasternal long-axis view with color Doppler over the mitral valve Right upper quadrant FAST view (liver, kidney diaphragm visible) Internal jugular vein & common carotid transverse view with color Doppler over both vessels Answer questions below to rate the device on: Ease of use Image quality Overall satisfaction

Do you have prior experience using this device?

- None - "I've never used this device before."  
 Some - "I've used this device occasionally in patient care or teaching workshops, but I am not proficient in using it."  
 Extensive - "I use this device on a regular basis and am familiar with it."  
 Other

If Other, please explain:

---

## EASE OF USE

### Rate your level of agreement with each of statements.

|                                                                                                                | Strongly agree        | Agree                 | Neutral               | Disagree              | Strongly disagree     |
|----------------------------------------------------------------------------------------------------------------|-----------------------|-----------------------|-----------------------|-----------------------|-----------------------|
| The physical characteristics of this device made it easy to use (size, weight, hold in hand vs. use of stand). | <input type="radio"/> | <input type="radio"/> | <input type="radio"/> | <input type="radio"/> | <input type="radio"/> |
| The software was easy to navigate (changing modes, depth, gain).                                               | <input type="radio"/> | <input type="radio"/> | <input type="radio"/> | <input type="radio"/> | <input type="radio"/> |
| The device is easy to maneuver with one hand on the probe and one hand on the tablet/processor.                | <input type="radio"/> | <input type="radio"/> | <input type="radio"/> | <input type="radio"/> | <input type="radio"/> |

### Rate your level of satisfaction with the following statement.

|                                                                | Very satisfied        | Somewhat satisfied    | Neutral               | Somewhat dissatisfied | Very dissatisfied)    |
|----------------------------------------------------------------|-----------------------|-----------------------|-----------------------|-----------------------|-----------------------|
| My overall satisfaction with the ease of using this device was | <input type="radio"/> | <input type="radio"/> | <input type="radio"/> | <input type="radio"/> | <input type="radio"/> |

Comments:

## IMAGE QUALITY

### Rate your level of agreement with each of statements.

|                                                                                                                                     | Strongly agree        | Agree                 | Neutral               | Disagree              | Strongly disagree     |
|-------------------------------------------------------------------------------------------------------------------------------------|-----------------------|-----------------------|-----------------------|-----------------------|-----------------------|
| The detail resolution (clarity of 2 small structures) was good enough to answer common clinical questions.                          | <input type="radio"/> | <input type="radio"/> | <input type="radio"/> | <input type="radio"/> | <input type="radio"/> |
| The contrast resolution (differentiate structures of different shades of gray) was good enough to answer common clinical questions. | <input type="radio"/> | <input type="radio"/> | <input type="radio"/> | <input type="radio"/> | <input type="radio"/> |
| The penetration (ability to see deep structures well) was good.                                                                     | <input type="radio"/> | <input type="radio"/> | <input type="radio"/> | <input type="radio"/> | <input type="radio"/> |
| The clutter (acoustic clutter/noise) on the screen was minimal.                                                                     | <input type="radio"/> | <input type="radio"/> | <input type="radio"/> | <input type="radio"/> | <input type="radio"/> |

### Rate your level of satisfaction with the following statement.

|                                                                   | Very satisfied        | Somewhat satisfied    | Neutral               | Somewhat dissatisfied | Very dissatisfied     |
|-------------------------------------------------------------------|-----------------------|-----------------------|-----------------------|-----------------------|-----------------------|
| My overall satisfaction with the image quality of this device was | <input type="radio"/> | <input type="radio"/> | <input type="radio"/> | <input type="radio"/> | <input type="radio"/> |

Comments:

## OVERALL SATISFACTION

Which statement best expresses your overall satisfaction with this device for use in patient care?

- DISSATISFIED - "I would not use this device even if was given to me for free."  
 NEUTRAL - "I don't have strong feeling for or against this device. I might use it in patient care."  
 SATISFIED - "I like this device and would definitely use it in patient care."

Please describe the characteristics that made you feel satisfied, neutral, or dissatisfied with this device:

What are the main ADVANTAGES and DISADVANTAGES of this device currently?

---

Assuming a similar purchasing price to other devices on the market, would you personally buy or recommend this device for use in patient care?

- Yes  
 No

---

Why or Why not?

---

Please press "Submit" after you have completed the survey. You will not be able to go back to a survey after you have pressed "Submit." You will be taken back to your queue of surveys to review the progress made and to select the next survey.

---

Please press "Save & Return Later" if you would like to save the information you have entered and return at a later time. You will be prompted to another screen to enter your email address. You will be sent an email to a unique link that will save your information.

# V-scan Air (GE)

## Instructions:

Obtain these 3 views Parasternal long-axis view with color Doppler over the mitral valve Right upper quadrant FAST view (liver, kidney diaphragm visible) Internal jugular vein & common carotid transverse view with color Doppler over both vessels Answer questions below to rate the device on: Ease of use Image quality Overall satisfaction

Do you have prior experience using this device?

- None - "I've never used this device before."  
 Some - "I've used this device occasionally in patient care or teaching workshops, but I am not proficient in using it."  
 Extensive - "I use this device on a regular basis and am familiar with it."  
 Other

If Other, please explain:

\_\_\_\_\_

## EASE OF USE

### Rate your level of agreement with each of statements.

|                                                                                                                | Strongly agree        | Agree                 | Neutral               | Disagree              | Strongly disagree     |
|----------------------------------------------------------------------------------------------------------------|-----------------------|-----------------------|-----------------------|-----------------------|-----------------------|
| The physical characteristics of this device made it easy to use (size, weight, hold in hand vs. use of stand). | <input type="radio"/> | <input type="radio"/> | <input type="radio"/> | <input type="radio"/> | <input type="radio"/> |
| The software was easy to navigate (changing modes, depth, gain).                                               | <input type="radio"/> | <input type="radio"/> | <input type="radio"/> | <input type="radio"/> | <input type="radio"/> |
| The device is easy to maneuver with one hand on the probe and one hand on the tablet/processor.                | <input type="radio"/> | <input type="radio"/> | <input type="radio"/> | <input type="radio"/> | <input type="radio"/> |

### Rate your level of satisfaction with the following statement.

|                                                                | Very satisfied        | Somewhat satisfied    | Neutral               | Somewhat dissatisfied | Very dissatisfied)    |
|----------------------------------------------------------------|-----------------------|-----------------------|-----------------------|-----------------------|-----------------------|
| My overall satisfaction with the ease of using this device was | <input type="radio"/> | <input type="radio"/> | <input type="radio"/> | <input type="radio"/> | <input type="radio"/> |

Comments:



**IMAGE QUALITY****Rate your level of agreement with each of statements.**

|                                                                                                                                     | Strongly agree        | Agree                 | Neutral               | Disagree              | Strongly disagree     |
|-------------------------------------------------------------------------------------------------------------------------------------|-----------------------|-----------------------|-----------------------|-----------------------|-----------------------|
| The detail resolution (clarity of 2 small structures) was good enough to answer common clinical questions.                          | <input type="radio"/> | <input type="radio"/> | <input type="radio"/> | <input type="radio"/> | <input type="radio"/> |
| The contrast resolution (differentiate structures of different shades of gray) was good enough to answer common clinical questions. | <input type="radio"/> | <input type="radio"/> | <input type="radio"/> | <input type="radio"/> | <input type="radio"/> |
| The penetration (ability to see deep structures well) was good.                                                                     | <input type="radio"/> | <input type="radio"/> | <input type="radio"/> | <input type="radio"/> | <input type="radio"/> |
| The clutter (acoustic clutter/noise) on the screen was minimal.                                                                     | <input type="radio"/> | <input type="radio"/> | <input type="radio"/> | <input type="radio"/> | <input type="radio"/> |

**Rate your level of satisfaction with the following statement.**

|                                                                   | Very satisfied        | Somewhat satisfied    | Neutral               | Somewhat dissatisfied | Very dissatisfied     |
|-------------------------------------------------------------------|-----------------------|-----------------------|-----------------------|-----------------------|-----------------------|
| My overall satisfaction with the image quality of this device was | <input type="radio"/> | <input type="radio"/> | <input type="radio"/> | <input type="radio"/> | <input type="radio"/> |

Comments:

**OVERALL SATISFACTION**

Which statement best expresses your overall satisfaction with this device for use in patient care?

- DISSATISFIED - "I would not use this device even if was given to me for free."  
 NEUTRAL - "I don't have strong feeling for or against this device. I might use it in patient care."  
 SATISFIED - "I like this device and would definitely use it in patient care."

Please describe the characteristics that made you feel satisfied, neutral, or dissatisfied with this device:

What are the main ADVANTAGES and DISADVANTAGES of this device currently?

---

Assuming a similar purchasing price to other devices on the market, would you personally buy or recommend this device for use in patient care?

- Yes  
 No

---

Why or Why not?

---

Please press "Submit" after you have completed the survey. You will not be able to go back to a survey after you have pressed "Submit." You will be taken back to your queue of surveys to review the progress made and to select the next survey.

---

Please press "Save & Return Later" if you would like to save the information you have entered and return at a later time. You will be prompted to another screen to enter your email address. You will be sent an email to a unique link that will save your information.

# FINAL Survey

**Based on your overall impression of the 4 handheld devices, rank them in order from best to worst (1=Best; 4=Worst).**

|                    | Butterfly             | Lumify                | Echonus               | Vscan air             |
|--------------------|-----------------------|-----------------------|-----------------------|-----------------------|
| 1st Choice (Best)  | <input type="radio"/> | <input type="radio"/> | <input type="radio"/> | <input type="radio"/> |
| 2nd Choice         | <input type="radio"/> | <input type="radio"/> | <input type="radio"/> | <input type="radio"/> |
| 3rd Choice         | <input type="radio"/> | <input type="radio"/> | <input type="radio"/> | <input type="radio"/> |
| 4th Choice (Worst) | <input type="radio"/> | <input type="radio"/> | <input type="radio"/> | <input type="radio"/> |

Comments:

If I had to buy a handheld ultrasound device today as my personal device that I would carry in my coat pocket, I would purchase:

- Butterfly
- Lumify
- Echonus
- Vscan air

Why? Briefly explain your rationale.

**When evaluating a handheld ultrasound device, rate the importance of the following characteristics.**

|                                                                           | Very important        | Somewhat important    | Not important         |
|---------------------------------------------------------------------------|-----------------------|-----------------------|-----------------------|
| Probe size                                                                | <input type="radio"/> | <input type="radio"/> | <input type="radio"/> |
| Wireless vs. wired probe                                                  | <input type="radio"/> | <input type="radio"/> | <input type="radio"/> |
| Availability of different probe types (linear, phased array, curvilinear) | <input type="radio"/> | <input type="radio"/> | <input type="radio"/> |
| Portability                                                               | <input type="radio"/> | <input type="radio"/> | <input type="radio"/> |
| Ease of use                                                               | <input type="radio"/> | <input type="radio"/> | <input type="radio"/> |
| Battery life                                                              | <input type="radio"/> | <input type="radio"/> | <input type="radio"/> |
| Manufacturer's warranty                                                   | <input type="radio"/> | <input type="radio"/> | <input type="radio"/> |
| Customer service with manufacturer based on prior experience              | <input type="radio"/> | <input type="radio"/> | <input type="radio"/> |

|                                                                                        |                       |                       |                       |
|----------------------------------------------------------------------------------------|-----------------------|-----------------------|-----------------------|
| Total costs                                                                            | <input type="radio"/> | <input type="radio"/> | <input type="radio"/> |
| Option to make a 1-time purchase vs. pay an ongoing fee to use it                      | <input type="radio"/> | <input type="radio"/> | <input type="radio"/> |
| Modes available in addition to B-mode                                                  | <input type="radio"/> | <input type="radio"/> | <input type="radio"/> |
| a. M-mode                                                                              |                       |                       |                       |
| b. Color Doppler                                                                       |                       |                       |                       |
| Software packages available (presets, calculations)                                    | <input type="radio"/> | <input type="radio"/> | <input type="radio"/> |
| Image quality                                                                          | <input type="radio"/> | <input type="radio"/> | <input type="radio"/> |
| Reputation of manufacturer                                                             | <input type="radio"/> | <input type="radio"/> | <input type="radio"/> |
| Carrying method (case vs. pocket)                                                      | <input type="radio"/> | <input type="radio"/> | <input type="radio"/> |
| Ability to connect probe to any tablet/phone vs. probe + processor connected as 1 unit | <input type="radio"/> | <input type="radio"/> | <input type="radio"/> |

---

Any other important characteristics not listed above? Please describe.

---

What are some of the unique advantages and disadvantages of each of the handheld devices that come to the top of your mind?

|           | Advantages | Disadvantages |
|-----------|------------|---------------|
| Kosmos    | _____      | _____         |
| Vscan Air | _____      | _____         |
| Butterfly | _____      | _____         |
| Lumify    | _____      | _____         |

---

Please press "Submit" after you have completed the survey. You will not be able to go back to a survey after you have pressed "Submit." You will be taken back to your queue of surveys to review the progress made and to select the next survey.

---

Please press "Save & Return Later" if you would like to save the information you have entered and return at a later time. You will be prompted to another screen to enter your email address. You will be sent an email to a unique link that will save your information.
