# Supplementary material for: Comparison of four handheld point-of-care ultrasound devices by expert users
Source: PubMed Central journal article supplement (PMC9263020; doi:10.1186/s13089-022-00274-6), 2022-07-07
Supplement: 13089_2022_274_MOESM2_ESM.pdf [file 13089_2022_274_MOESM2_ESM.pdf]

Table S1. Individual Expert's Experience with Devices Compared to Ratings for Overall Satisfaction, Image Quality, and Ease-of-Use

| Expert    | Butterfly IQ+™ |     |      |      | Lumify™ |     |      |      | Kosmos™ |     |      |      | Vscan Air™ |     |      |      |
|-----------|----------------|-----|------|------|---------|-----|------|------|---------|-----|------|------|------------|-----|------|------|
|           | Exp            | Sat | Qual | Ease | Exp     | Sat | Qual | Ease | Exp     | Sat | Qual | Ease | Exp        | Sat | Qual | Ease |
| <b>1</b>  | 3              | 1   | 2.50 | 4.33 | 2       | 3   | 4.00 | 3.67 | 1       | 3   | 5.00 | 3.33 | 1          | 2   | 4.00 | 5.00 |
| <b>2</b>  | 3              | 1   | 1.00 | 4.33 | 3       | 3   | 5.00 | 4.00 | 1       | 3   | 5.00 | 3.33 | 2          | 3   | 4.75 | 5.00 |
| <b>3</b>  | 3              | 3   | 4.75 | 5.00 | 1       | 2   | 4.75 | 3.33 | 1       | 2   | 4.75 | 3.33 | 1          | 3   | 4.75 | 5.00 |
| <b>4</b>  | 2              | 1   | 2.50 | 4.00 | 3       | 3   | 4.25 | 3.67 | 2       | 2   | 4.00 | 3.67 | 1          | 3   | 3.75 | 3.67 |
| <b>5</b>  | 1              | 3   | 3.25 | 4.00 | 2       | 3   | 4.00 | 4.00 | 1       | 3   | 4.00 | 3.67 | 1          | 3   | 4.00 | 4.00 |
| <b>6</b>  | 2              | 1   | 3.50 | 4.67 | 2       | 2   | 5.00 | 5.00 | 2       | 2   | 5.00 | 4.00 | 2          | 1   | 2.00 | 4.67 |
| <b>7</b>  | 3              | 3   | 3.00 | 5.00 | 1       | 2   | 4.00 | 3.33 | 1       | 3   | 5.00 | 4.33 | 2          | 1   | 3.50 | 4.00 |
| <b>8</b>  | 3              | 2   | 2.50 | 3.33 | 1       | 3   | 4.50 | 4.33 | 1       | 3   | 4.75 | 3.67 | 1          | 3   | 4.75 | 4.00 |
| <b>9</b>  | 2              | 2   | 3.50 | 4.33 | 2       | 3   | 4.75 | 4.67 | 1       | 2   | 4.00 | 2.33 | 1          | 3   | 4.75 | 4.67 |
| <b>10</b> | 3              | 3   | 3.75 | 4.67 | 1       | 3   | 4.00 | 3.67 | 2       | 3   | 4.00 | 3.67 | 1          | 2   | 3.75 | 3.00 |
| <b>11</b> | 1              | 3   | 4.00 | 4.33 | 1       | 2   | 5.00 | 4.00 | 1       | 2   | 4.25 | 3.33 | 2          | 2   | 4.00 | 3.33 |
| <b>12</b> | 3              | 2   | 3.25 | 4.67 | 2       | 3   | 5.00 | 4.67 | 1       | 2   | 4.25 | 4.00 | 2          | 2   | 4.25 | 4.00 |
| <b>13</b> | 3              | 2   | 1.00 | 3.00 | 3       | 3   | 4.00 | 3.00 | 1       | 3   | 4.00 | 3.67 | 1          | 3   | 4.00 | 4.00 |
| <b>14</b> | 3              | 2   | 2.50 | 4.67 | 3       | 3   | 4.75 | 4.67 | 2       | 2   | 3.50 | 4.00 | 1          | 3   | 4.00 | 5.00 |
| <b>15</b> | 3              | 3   | 3.25 | 5.00 | 1       | 3   | 4.00 | 4.00 | 1       | 3   | 5.00 | 4.00 | 1          | 3   | 5.00 | 5.00 |

|                      |   |      |      |      |   |      |      |      |   |       |       |      |   |       |       |       |
|----------------------|---|------|------|------|---|------|------|------|---|-------|-------|------|---|-------|-------|-------|
| <b>16</b>            | 1 | 2    | 3.00 | 4.00 | 1 | 3    | 5.00 | 4.33 | 1 | 3     | 5.00  | 2.67 | 1 | 3     | 5.00  | 4.33  |
| <b>17</b>            | 2 | 2    | 2.75 | 4.00 | 1 | 3    | 4.00 | 4.00 | 1 | 3     | 4.00  | 4.33 | 1 | 3     | 4.00  | 4.67  |
| <b>18</b>            | 3 | 2    | 3.75 | 4.00 | 2 | 2    | 3.75 | 3.00 | 1 | 1     | 4.25  | 2.67 | 1 | 3     | 3.75  | 4.67  |
| <b>19</b>            | 2 | 2    | 2.50 | 3.00 | 2 | 3    | 5.00 | 5.00 | 1 | 2     | 3.50  | 4.00 | 2 | 3     | 5.00  | 5.00  |
| <b>20</b>            | 3 | 3    | 3.50 | 4.67 | 3 | 3    | 4.50 | 5.00 | 1 | 3     | 5.00  | 3.67 | 1 | 2     | 4.75  | 5.00  |
| <b>21</b>            | 2 | 1    | 3.00 | 2.67 | 2 | 3    | 4.75 | 4.33 | 2 | 3     | 4.75  | 4.33 | 2 | 3     | 4.00  | 4.00  |
| <b>22</b>            | 3 | 3    | 4.00 | 4.00 | 3 | 3    | 4.75 | 5.00 | 2 | 2     | 4.00  | 3.67 | 1 | 3     | 4.50  | 4.67  |
| <b>23</b>            | 1 | 2    | 2.75 | 4.33 | 1 | 3    | 4.75 | 4.00 | 2 | 3     | 4.50  | 5.00 | 2 | 2     | 2.75  | 5.00  |
| <b>24</b>            | 2 | 1    | 2.25 | 4.00 | 2 | 3    | 5.00 | 4.00 | 2 | 2     | 3.75  | 3.00 | 2 | 3     | 3.75  | 4.33  |
| <b>r<sub>s</sub></b> |   | 0.18 | 0.01 | 0.36 |   | 0.31 | 0.09 | 0.25 |   | -0.20 | -0.31 | 0.29 |   | -0.40 | -0.28 | -0.06 |
| <b>p-val</b>         |   | 0.40 | 0.96 | 0.09 |   | 0.14 | 0.67 | 0.23 |   | 0.36  | 0.14  | 0.17 |   | 0.05  | 0.19  | 0.77  |

**Exp:** Experience: 3=Extensive ("I use this device on a regular basis"), 2=Some ("I've used this device occasionally"), 1=None ("I've never used this device before").

**Sat:** Overall Satisfaction: 3=Satisfied ("I would use it in patient care"), 2=Neutral ("I might use it in patient care"), 1=Dissatisfied ("I would not use").

**Qual:** The average of 4 categories of Image Quality, each ranked on a scale of 1 to 5, with 5 indicating the most satisfaction.

**Ease:** The average of 3 categories of Ease-of-Use, each ranked on a scale of 1 to 5, with 5 indicating the most satisfaction.

*r<sub>s</sub>* is the Spearman correlation coefficient, and **p-val** is the p-value of the test of association based on the Spearman correlation coefficient.
