# Supplementary material for: Comparison of four handheld point-of-care ultrasound devices by expert users
Source: PubMed Central journal article supplement (PMC9263020; doi:10.1186/s13089-022-00274-6), 2022-07-07
Supplement: 13089_2022_274_MOESM3_ESM.pdf [file 13089_2022_274_MOESM3_ESM.pdf]

**Table S2. Importance of Characteristics for a Handheld Ultrasound Device**

| Characteristic                         | Very Important | Somewhat Important | Not Important |
|----------------------------------------|----------------|--------------------|---------------|
| <b>5 Most Important</b>                |                |                    |               |
| Image Quality                          | 24             | 0                  | 0             |
| Ease of Use                            | 20             | 4                  | 0             |
| Portability                            | 19             | 5                  | 0             |
| Total Costs                            | 17             | 7                  | 0             |
| Availability of Different Probes       | 17             | 6                  | 1             |
| <b>Intermediate Importance</b>         |                |                    |               |
| Battery Life                           | 15             | 7                  | 2             |
| Probe Size                             | 13             | 10                 | 1             |
| Availability of Additional Modes       | 11             | 13                 | 0             |
| Ability to Connect to Any Tablet/phone | 10             | 11                 | 3             |
| Availability of Software Packages      | 9              | 13                 | 2             |
| Customer Service (prior experience)    | 8              | 15                 | 1             |
| <b>5 Least Important</b>               |                |                    |               |
| Option for 1-time Purchase             | 9              | 12                 | 3             |
| Manufacturer's Warranty                | 6              | 16                 | 2             |
| Carrying Method                        | 8              | 11                 | 5             |
| Reputation of Manufacturer             | 6              | 15                 | 3             |
| Wireless vs Wired                      | 7              | 12                 | 5             |
